# Supplementary material for: Highly elastic graphene oxide–epoxy composite aerogels via simple freeze-drying and subsequent routine curing
Source: Royal Society of Chemistry journal article supplement (doi:10.1039/c2ta01142e), 2013-01-01
Supplement: c2ta01142e.pdf [file c2ta01142e.pdf]

Supplementary Information for

## Highly elastic graphene oxide/epoxy composite aerogels via simple freeze-drying and subsequent routine curing

Shibing Ye, Jiachun Feng\* and Peiyi Wu

1. Digital pictures of GEA before and after freeze-drying and curing

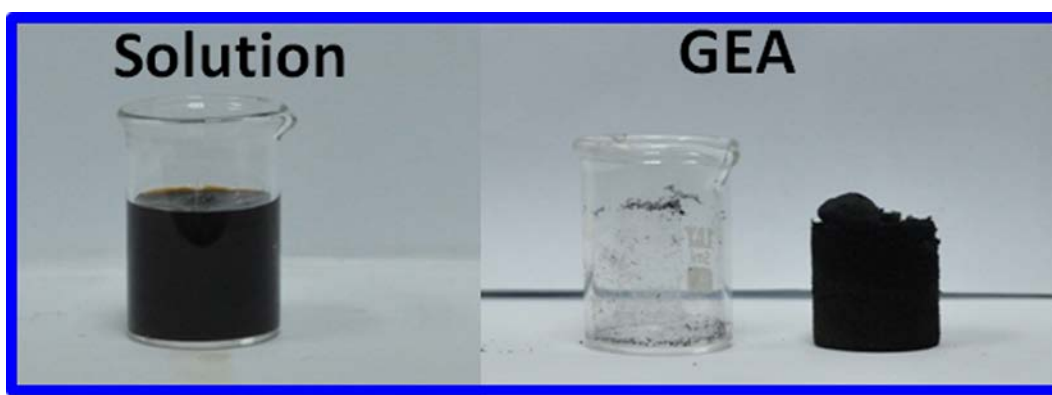

Figure S1 Digital pictures of GEA before and after freeze-drying and curing.

2. Pore size distributions of GEA-5 and GEA-9 determined by using mercury injection method

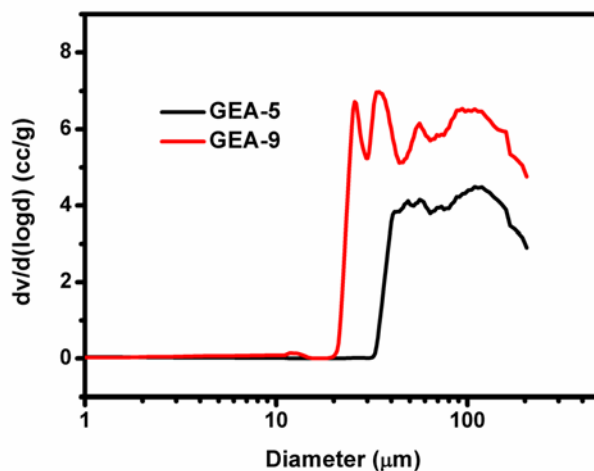

Figure S2 Pore size distributions for 2 representative GEA samples.

### 3. Digital pictures for the comparison of different recovery behaviors of GOA and GEA

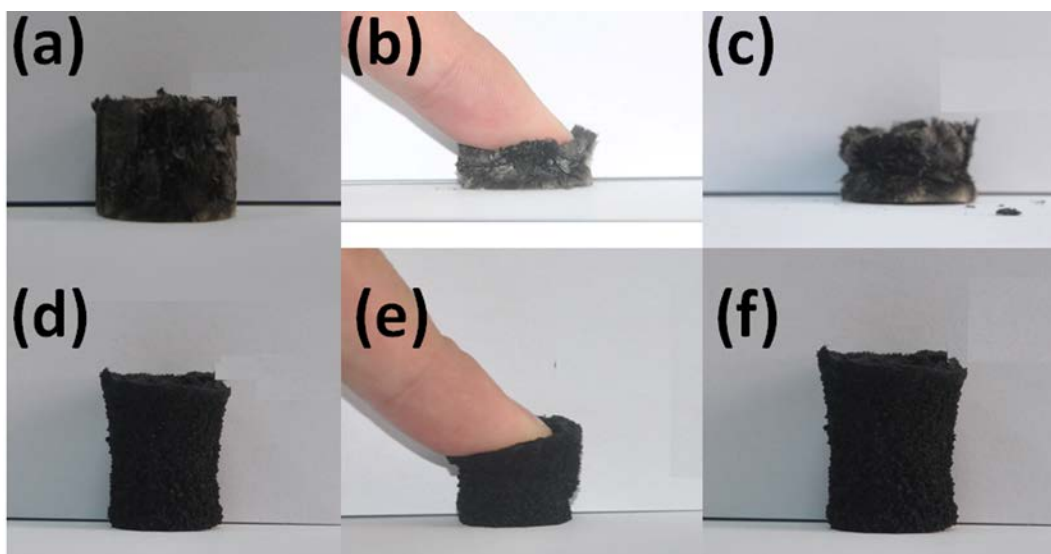

**Figure S3** Digital pictures for the comparison of different recovery behaviors of GOA and GEA. GOA (a, b and c) was readily broken by slight compression; GEA (d, e and f) immediately recovered its original shape upon the removal of the high compression force.

### 4. Compression stress-strain curves and average strength values of GEA-11 and GEA-13

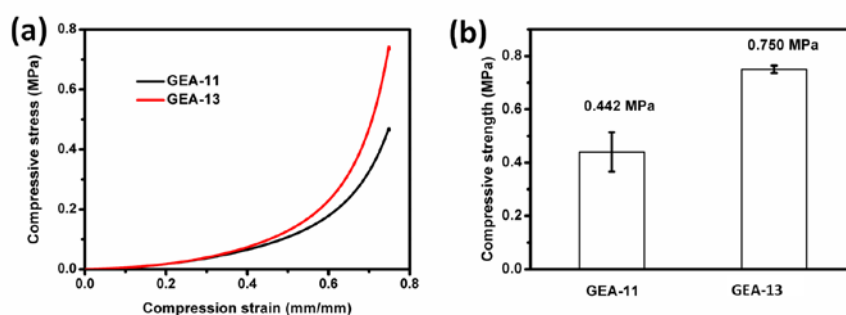

**Figure S4** The representative stress-strain curves (a) and average compressive strength values at 75% strains (b) of GEA-11 and GEA-13.
